# Supplementary material
Source: HighWire-hosted journal article supplement (https://bmjopen.bmj.com/content/12/1/e053641)

"I am worried about being experimented on"

"I am worried about COVID vaccine safety"

"Vaccine is important to protect others"

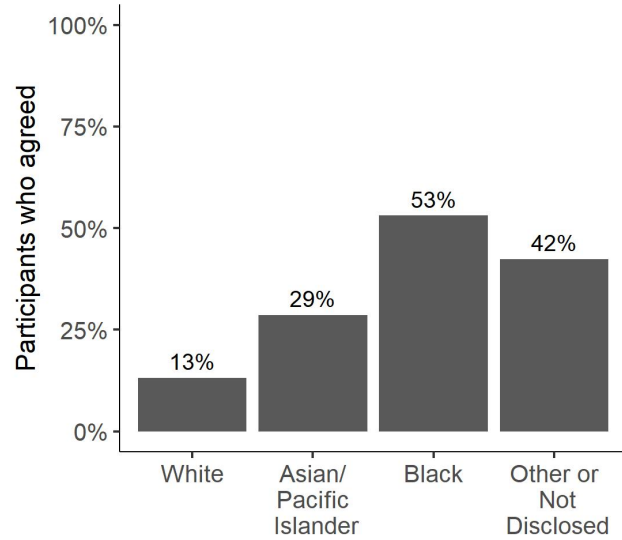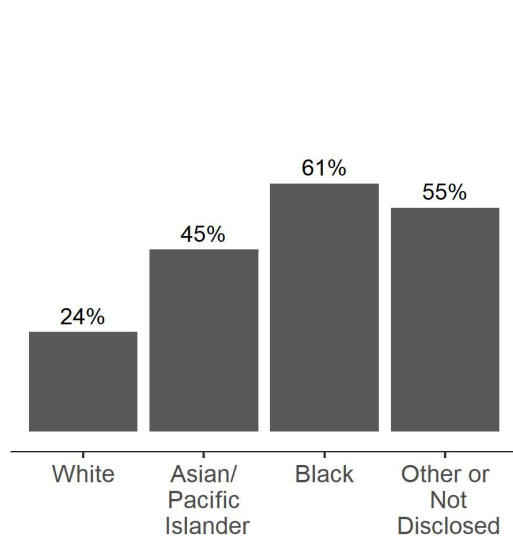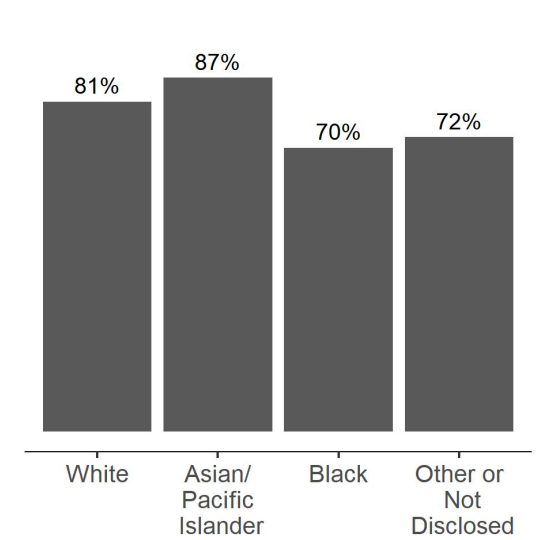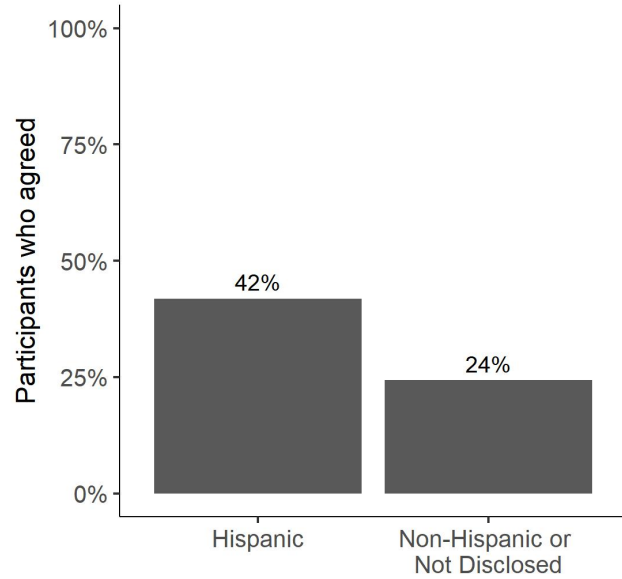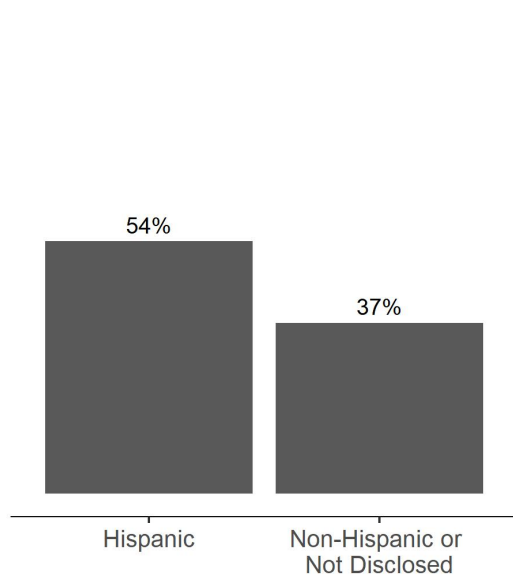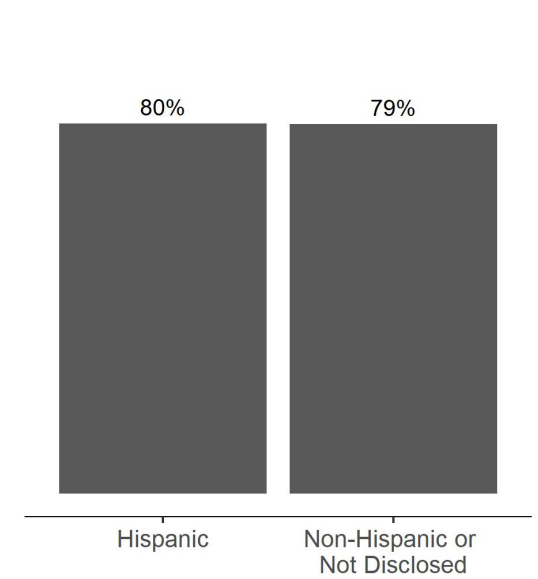

Supplement: inline-supplementary-material-4 [file inline-supplementary-material-4.pdf]
