# Supplementary material
Source: HighWire-hosted journal article supplement (https://bmjopen.bmj.com/content/12/1/e053641)

### "Who do you trust MOST to give you advice on COVID-19 vaccines?" for vaccinated

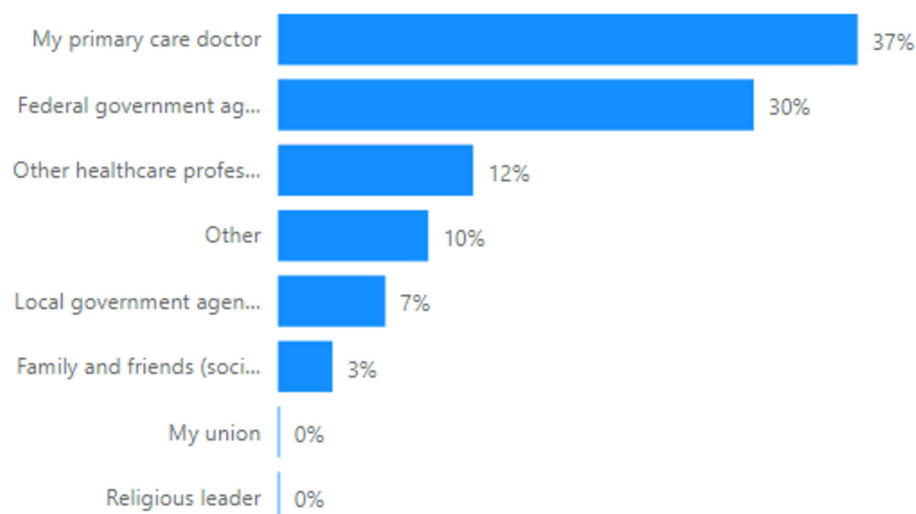

### "Who do you trust MOST to give you advice on COVID-19 vaccines?" for unvaccinated

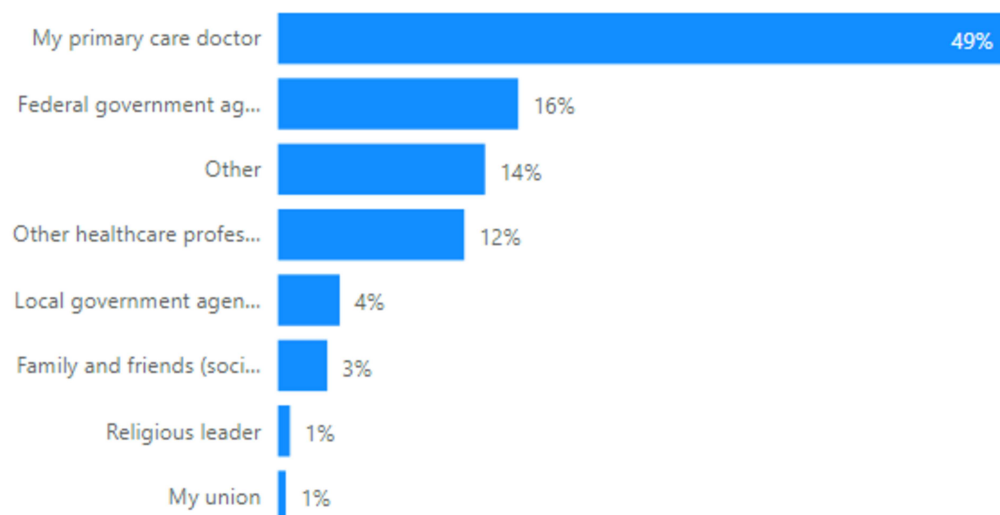

Supplement: inline-supplementary-material-6 [file inline-supplementary-material-6.pdf]
