# Supplementary material
Source: HighWire-hosted journal article supplement (https://bmjopen.bmj.com/content/12/1/e053641)

COVID Vaccine receipt over time (biweekly)

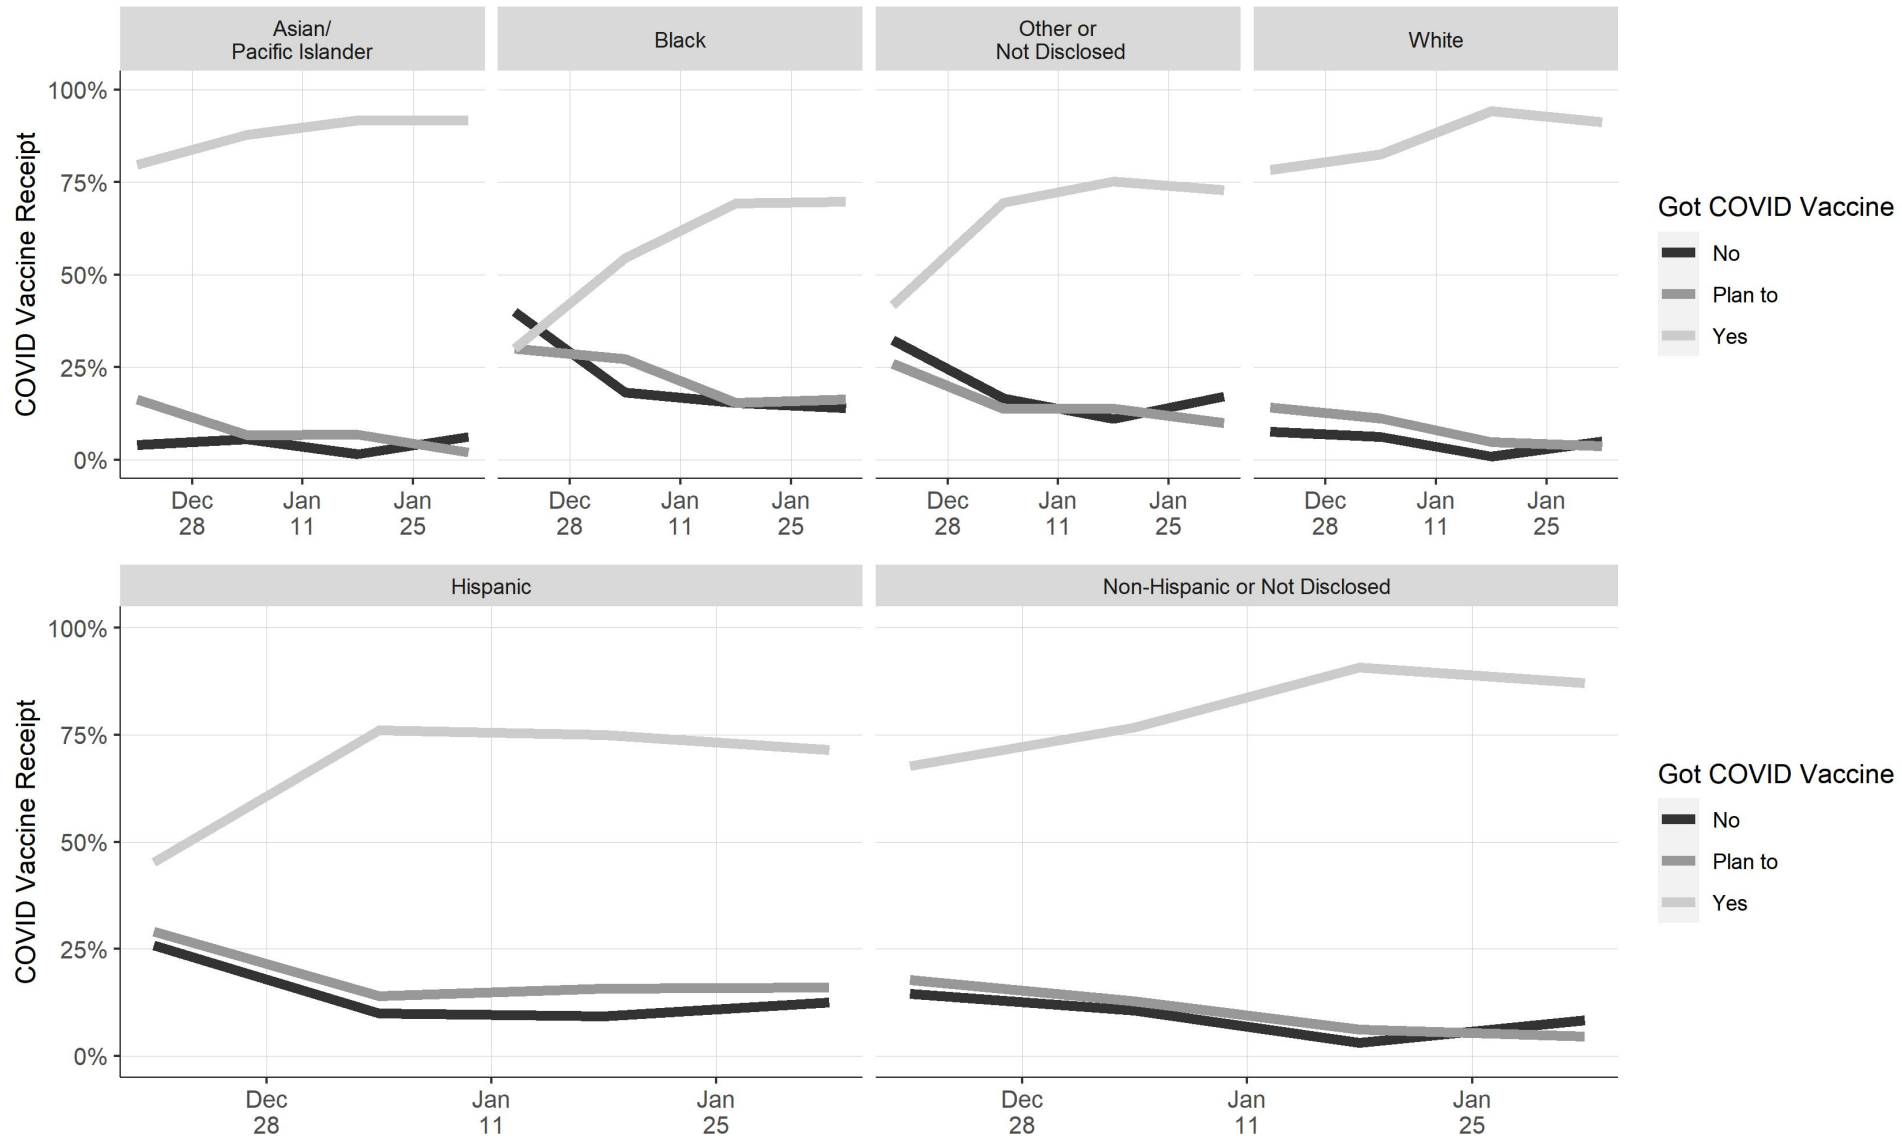

Supplement: inline-supplementary-material-10 [file inline-supplementary-material-10.pdf]

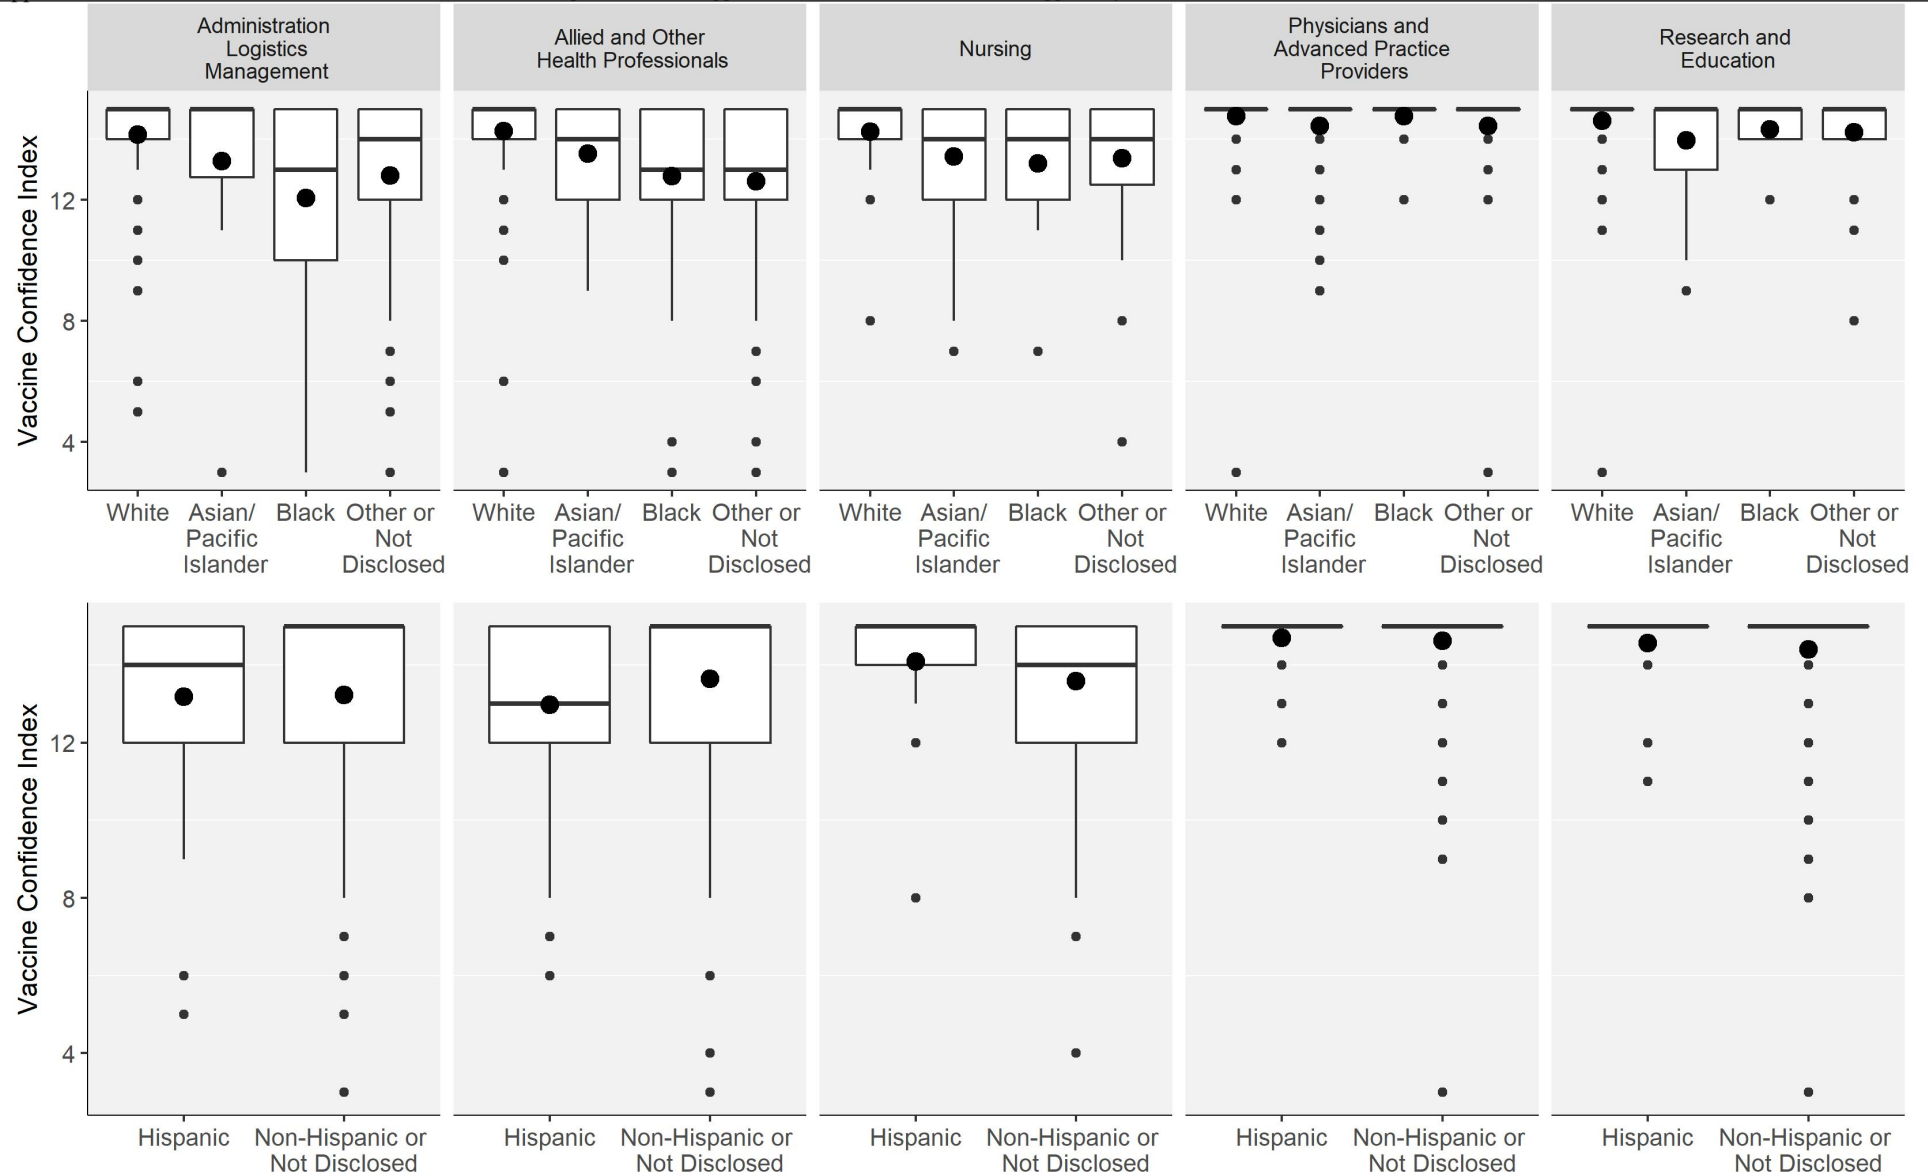

Supplement: inline-supplementary-material-5 [file inline-supplementary-material-5.pdf]

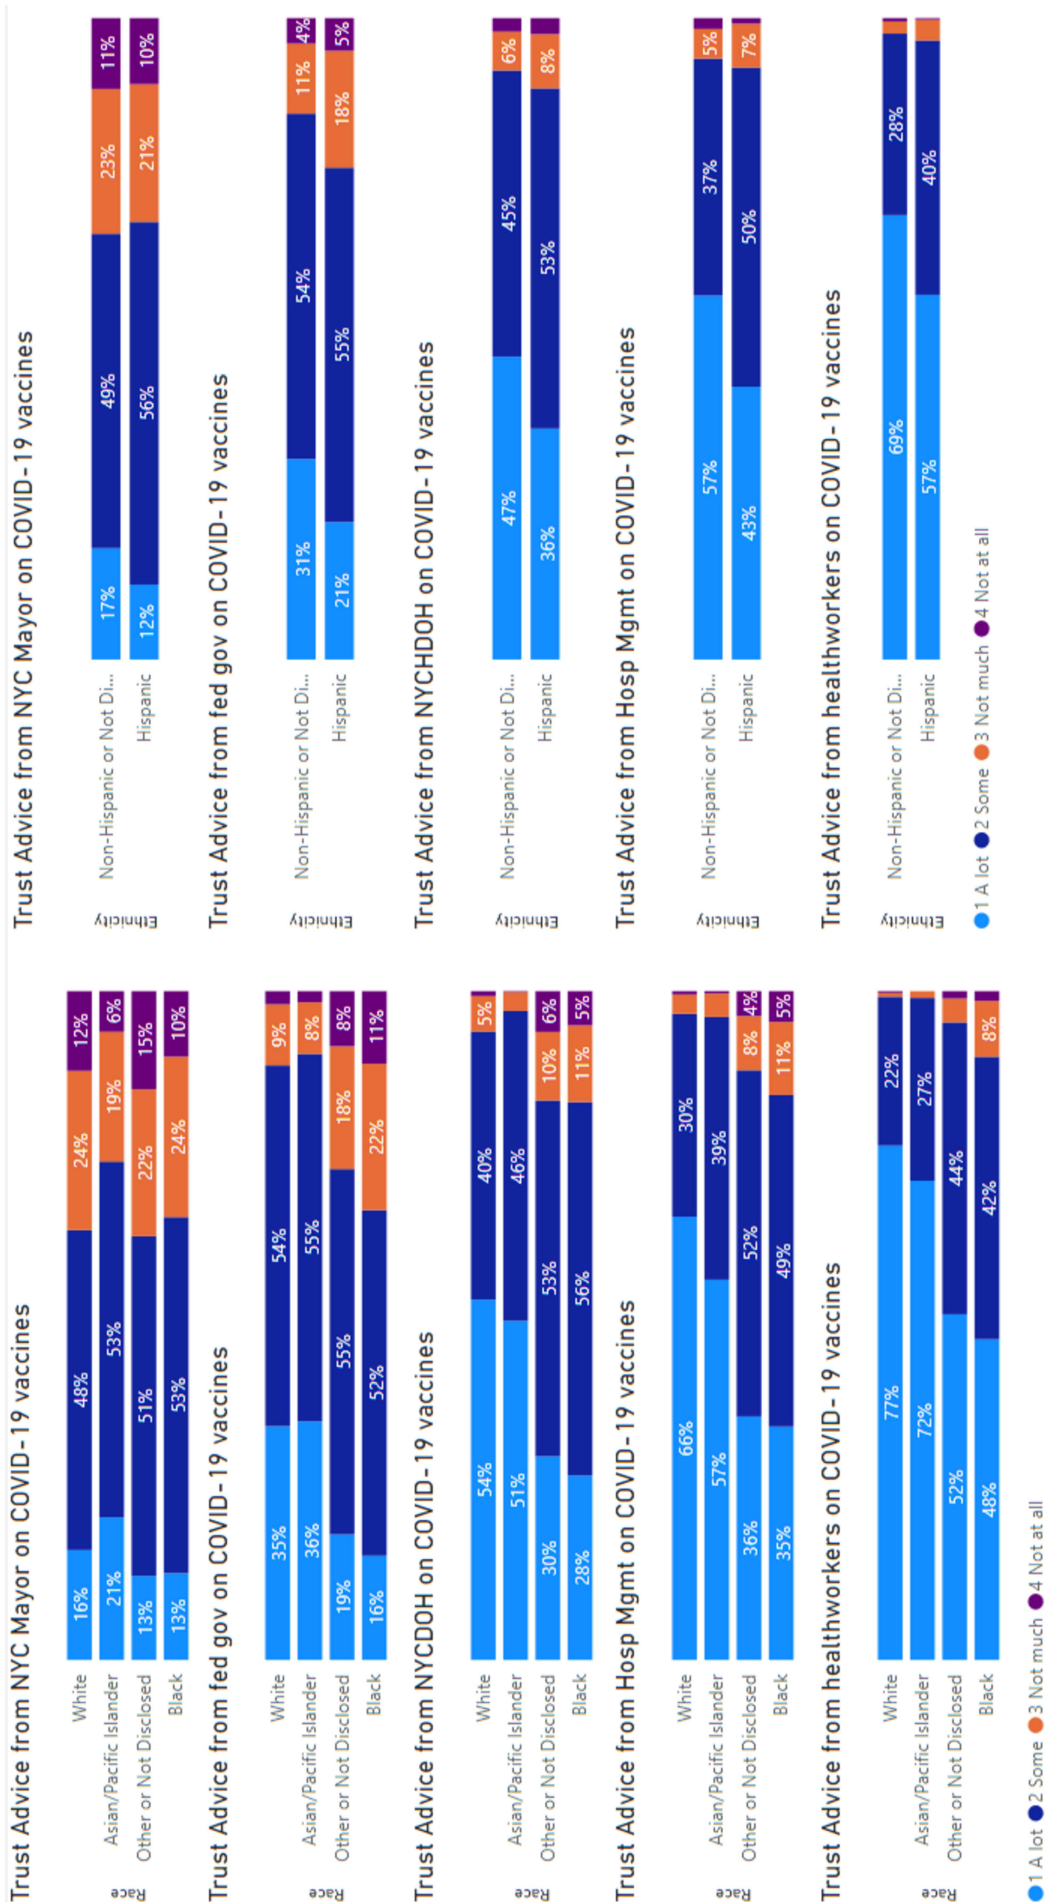

Supplement: inline-supplementary-material-7 [file inline-supplementary-material-7.pdf]
